# Modelling the emergence of an egalitarian society in the n-player game framework

Kohei Tamura<sup>\*1</sup> and Hiroki Takikawa<sup>1</sup>

<sup>1</sup>Frontier Research Institute for Interdisciplinary Sciences, Tohoku  
University

April 12, 2018

## Abstract

1 Unlike other primates, human foragers have an egalitarian society. Therefore, the evo-  
2 lution of egalitarian behaviour has been the subject of long-standing debate in a wide  
3 variety of disciplines. A recent hypothesis states that a social control against potentially  
4 dominant individuals played an important role in the emergence of an egalitarian society,  
5 although this has not been modelled directly. In the present study, we modelled this hy-  
6 pothesis based on the n-player game framework, in which the owner, who may attempt  
7 to monopolise resources, could be punished by a coalition of other group members. Our  
8 results suggest that a potentially despotic payoff structure can promote the evolution of  
9 egalitarian behaviour. Besides, large group size, small cost of competition, and variation

---

\*tmr.kohei@gmail.com

10 in the strengths of individuals can promote the evolution of egalitarian behaviour. Our  
11 results suggest the importance of both social control against dominant individuals and  
12 benefits of a coalition for the evolution of egalitarian behaviour.

## 13 **Keywords**

14 coalition formation; resource sharing; equality

# 15 **1 Introduction**

16 The emergence of an egalitarian society among foragers has been a long-standing question  
17 in biology, anthropology, and other social sciences. Apes, which are phylogenetically close  
18 to humans, are known for forming rather strong dominant hierarchies with authoritarian  
19 leadership [1, 2]. Although humans have also developed highly unequal social systems  
20 ranging from chiefdoms to the modern states [3], psychological and economic studies have  
21 reported a large body of evidence supporting egalitarian motives of humans in modern  
22 industrialised societies [4–6].

23 The key to understanding the development of an egalitarian society is egalitarian  
24 ethos. Ethnographic studies reported the existence of egalitarian ethos in a wide variety  
25 of forager societies [7]. In addition, the innate human tendency of aversion to inequality  
26 has been examined by recent behavioural experiment studies [6, 8–12]. Thus, the hy-  
27 pothesis that claims that the evolution of egalitarian ethos enabled humans to develop  
28 and maintain an equal social system is worth extensive investigation.

29 The theory of the evolution of egalitarian ethos was mostly elaborated in Boehm’s  
30 series of seminal works [13–16]. Based on extensive evidence from Late-Pleistocene-  
31 appropriate foraging societies, he hypothesised that social control plays a central role  
32 in the evolution of egalitarian ethos. Foragers have a social control system to punish  
33 those who violate egalitarian norms or use bossy behaviours. For example, if a hunter,  
34 who is strong and has potential to become an alpha male, tried to monopolise game  
35 meat, other members would form a coalition and collectively punish the norm-violating  
36 member. This greatly reduces the fitness of would-be alpha males, thus leading to the  
37 evolution of egalitarian ethos and norm-confirming behaviours.

38 The remaining question to be addressed is, ‘Which conditions exactly allow collective  
39 punishment to be effective and promote the evolution of egalitarian ethos?’ To answer  
40 this question, mathematical modelling of the evolution of egalitarian ethos is employed.

41 A number of mathematical models of the evolution of egalitarian behaviour have

42 been developed based on various frameworks including the ultimatum game [17–20],  
43 bargaining game [21], prisoner’s dilemma with punishment [22,23], and hawk-dove game  
44 [24]. Among them, Gavrilets’s [24] model is the one most directly related to collective  
45 punishment for monopolisers, as it models owner-bully-helper interactions. The ‘owner’  
46 has an item, and the ‘bully’ may try to take it from the owner. The ‘helper’ may decide  
47 to form a coalition with the owner to fight the bully. Using numerical simulations, he  
48 showed that, under some conditions, the evolution of helping behaviour can occur. The  
49 key assumption here is that a fitness function takes the form of a generalisation of the  
50 Tullock contest success function [25]. This implies that stopping the bully may contribute  
51 to improvement of the fitness of not only owners but also helpers.

52 Gavrilets’s model provides several useful insights. Among others, employing a gen-  
53 eralisation of the Tullock contest success function as a fitness function is crucial to  
54 understanding the evolution of an egalitarian society from a game-theoretical viewpoint.

55 However, the assumption of Gavrilets’s [24] model seems to be different from the  
56 ethnographic observations and Boehm’s hypothesis in some respects. First, it assumes  
57 that, maximally, two individuals attempt to punish the norm violator. However, ethno-  
58 graphic reports suggest that all group members punished the norm violator; therefore,  
59 the n-player game framework, in which all group members make their decision, seems  
60 more appropriate. Second, Boehm’s hypothesis assumes that the owner of the resource  
61 would be punished if he or she would not share the resource; however, in Gavrilets’s  
62 model, the bully who attempted to take the resource from the owner is the individual  
63 to be punished. In the present study, to model Boehm’s hypothesis more directly, we  
64 use the n-player game framework. We investigate which factors can affect the evolu-  
65 tion of egalitarian behaviour, or the coevolution of resource sharing and punishment of  
66 monopolisers.

## 67 2 Model

68 We consider a population of infinite individuals with non-overlapping generations. For  
69 simplicity, we assume that these individuals reproduce asexually. At the beginning of  
70 each generation, individuals form a group consisting of  $n$  individuals. In each group,  
71 an individual is randomly chosen and becomes the owner of an amount of resource,  $R$ .  
72 We refer to an individual who is not an owner as a peer. The owner equally allocates  
73 the resource within the group or attempts to monopolise it. The individuals are divided  
74 into two types,  $E_0$  and  $E_1$ , based on their behaviour as an owner. On one hand, an  $E_0$   
75 owner attempts to monopolise the resource, which may lead to competition within the  
76 group. On the other hand, an  $E_1$  owner shares the resource so that all group members,  
77 including the owner, obtain  $R/n$ . The individuals are also classified into two types,  $C_0$   
78 and  $C_1$ , according to their behaviour as a peer. A  $C_0$  peer does nothing against the  
79 monopolisation by the owner. If the owner shares the resource, a  $C_1$  peer does not form  
80 a coalition and enjoys the resource  $R/n$ , whereas, if the owner attempts to monopolise  
81 the resource,  $C_1$  peers form a coalition to penalise the owner. If there is at least one  $C_1$   
82 peer, competition over the resource occurs. We use the Bradley–Terry model to describe  
83 the probability of individual (or group)  $i$  winning against individual (or group)  $j$ , which  
84 is defined by

$$f(s_i, s_j) = \frac{1}{1 + e^{-\gamma(s_i - s_j)}}, \quad (1)$$

85 where  $s_a$  is the strength of an individual or coalition  $a$ , and  $\gamma$  is a parameter to reg-  
86 ulate how difference in strength affects the result of the competition. Individuals are  
87 dichotomised into two categories based on their strength—strong or weak—and their  
88 strength is denoted by  $s_s$  and  $s_w$ , respectively. We assume that the strength of individ-  
89 uals is determined during their developmental process: an individual becomes strong or  
90 weak with probabilities  $\phi$  and  $1 - \phi$ , respectively. Let  $k_s$  and  $k_w$  denote the numbers of  
91 strong and weak individuals in a coalition, respectively. The strength of the coalition of

92  $k = (k_s + k_w)$  individuals,  $S(k_s, k_w)$ , is defined by  $k^\alpha \bar{s}$ , where  $k$  is the number of individ-  
 93 uals who join the coalition,  $\bar{s}$  is the average strength of the coalition ( $= [k_s s_s + k_w s_w]/k$ ),  
 94 and  $\alpha (> 0)$  is a parameter to regulate the synergy of the coalition. If the owner wins  
 95 the competition, the owner gains resource  $R$ , and individuals who joined the coalition  
 96 suffer the cost  $c$ . If the coalition wins, the owner suffers the cost  $c$ , and members of the  
 97 coalition share the resource so that they gain an equal amount of the resource  $R/k$ .

98 There are four strategies,  $E_0C_0$ ,  $E_0C_1$ ,  $E_1C_0$ , and  $E_1C_1$ , which we refer to as ‘monop-  
 99 oliser’, ‘greedy’, ‘pacifist’, and ‘egalitarian’, respectively. Their frequencies are denoted  
 100 by  $x_{00}$ ,  $x_{01}$ ,  $x_{10}$ , and  $x_{11}$ , respectively.

101 Let  $\pi$  and  $\rho$  denote the payoffs when the focal individual is the owner and peer,  
 102 respectively. The probability that the numbers of strong and weak  $C_1$  individuals in a  
 103 group of  $n$  are  $k_s$  and  $k_w$ , respectively; then  $q(n, k_s, k_w)$  is defined by

$$q(n, k_s, k_w) = \frac{(n-1)!}{(n-k_s-k_w-1)!k_s!k_w!} (1-p)^{n-k_s-k_w-1} p_s^{k_s} p_w^{k_w}, \quad (2)$$

104 where  $p = x_{01} + x_{11}$ ,  $p_s = \phi p$ , and  $p_w = (1-\phi)p$ .

105 The payoffs of the four strategies as an owner are

$$\pi_{00,s} = \sum_{k_s=0}^{n-1} \sum_{k_w=0}^{n-1-k_s} q(n-1, k_s, k_w) \left[ \tilde{f}(s_s, S(k_s, k_w))R - (1 - \tilde{f}(s_s, S(k_s, k_w)))c \right], \quad (3)$$

$$\pi_{01,w} = \sum_{k_s=0}^{n-1} \sum_{k_w=0}^{n-1-k_s} q(n-1, k_s, k_w) \left[ \tilde{f}(s_w, S(k_s, k_w))R - (1 - \tilde{f}(s_w, S(k_s, k_w)))c \right], \quad (4)$$

$$\pi_{01,s} = \pi_{00,s}, \quad (5)$$

$$\pi_{01,w} = \pi_{00,w}, \quad (6)$$

$$\pi_{10,s} = \pi_{10,w} = \pi_{11,s} = \pi_{11,w} = R/n, \quad (7)$$

106 where

$$\tilde{f}(s_i, s_j) = \begin{cases} 1 & (k = 0) \\ f(s_i, s_j) & (\text{otherwise}). \end{cases}$$

107 Because their behaviour as owners is identical, the payoffs of monopoliser and greedy  
 108 individuals are the same depending on the strength of individuals. Further, the payoffs  
 109 of pacifist and egalitarian individuals are identical irrespective of their strengths, because  
 110 they share the resource.

111 Likewise, the payoffs of the four strategies as a peer are

$$\rho_{00,s} = \rho_{00,w} = yR/n, \quad (8)$$

$$\begin{aligned} \rho_{01,s} &= yR/n \\ &+ (1-y) \sum_{k_s=0}^{n-2} \sum_{k_w=0}^{n-2-k_s} q(n-2, k_s, k_w) \left[ \{\phi f(S(k_s+1, k_w), s_s) + (1-\phi)f(S(k_s+1, k_w), s_w)\}R/k \right. \\ &\left. - \{\phi(1-f(S(k_s+1, k_w), s_s)) + (1-\phi)(1-f(S(k_s+1, k_w), s_w))\}c \right], \end{aligned} \quad (9)$$

$$\begin{aligned} \rho_{01,w} &= yR/n \\ &+ (1-y) \sum_{k_s=0}^{n-2} \sum_{k_w=0}^{n-2-k_s} q(n-2, k_s, k_w) \left[ \{\phi f(S(k_s, k_w+1), s_s) + (1-\phi)f(S(k_s, k_w+1), s_w)\}R/k \right. \\ &\left. - \{\phi(1-f(S(k_s, k_w+1), s_s)) + (1-\phi)(1-f(S(k_s, k_w+1), s_w))\}c \right], \end{aligned} \quad (10)$$

$$\rho_{10,s} = \rho_{10,w} = \rho_{00,s}, \quad (11)$$

$$\rho_{11,s} = \rho_{01,s}, \quad (12)$$

$$\rho_{11,w} = \rho_{01,w}, \quad (13)$$

112 where  $y = x_{10} + x_{11}$ . The payoffs of monopoliser and pacifist individuals are identical  
 113 irrespective of their strengths, because they do nothing as a peer. Because their be-  
 114 haviour as peers is identical, the payoffs of greedy and egalitarian individuals are the  
 115 same depending on the strengths of individuals.

116 The recursion equation is defined by

$$x'_{00} = [\phi e^{\beta(\sigma\pi_{00,s}+(1-\sigma)\rho_{00,s})}x_{00} + (1-\phi)e^{\beta(\sigma\pi_{00,w}+(1-\sigma)\rho_{00,w})}x_{00}]/W, \quad (14)$$

$$x'_{01} = [\phi e^{\beta(\sigma\pi_{01,s}+(1-\sigma)\rho_{01,s})}x_{01} + (1-\phi)e^{\beta(\sigma\pi_{01,w}+(1-\sigma)\rho_{01,w})}x_{01}]/W, \quad (15)$$

$$x'_{10} = [\phi e^{\beta(\sigma\pi_{10,s}+(1-\sigma)\rho_{10,s})}x_{10} + (1-\phi)e^{\beta(\sigma\pi_{10,w}+(1-\sigma)\rho_{10,w})}x_{10}]/W, \quad (16)$$

$$x'_{11} = [\phi e^{\beta(\sigma\pi_{11,s}+(1-\sigma)\rho_{11,s})}x_{11} + (1-\phi)e^{\beta(\sigma\pi_{11,w}+(1-\sigma)\rho_{11,w})}x_{11}]/W, \quad (17)$$

117 where  $\sigma$  represents the intensity of selection. For simplicity, we assume  $\sigma = 1/2$ .  $W$  is  
118 the mean fitness of the population.  $\beta$  regulates the potential of inequality ( $0 \leq \beta$ ). A low  
119 value of  $\beta$  indicates a society wherein all individuals can enjoy the same reproductive  
120 success. Suppose, for example, when  $\beta = 0$ , all individuals receive the same amount  
121 of payoffs irrespective of their behaviour. A high value of  $\beta$  indicates the potential for  
122 disparity because a minor difference in the payoffs can be translated into a large difference  
123 in fitness.

124 Figure 1 shows the payoffs of the owner and peers in different situations.

## 125 Numerical Analysis

126 We set  $x_{00} = 0.97$ ,  $x_{01} = 0.01$ ,  $x_{10} = 0.01$ , and  $x_{11} = 0.01$  as the initial conditions. We  
127 regard the frequencies after 30,000 generations as equilibrium frequencies.

128 In what follows, we regard the egalitarian behaviour and an egalitarian society as  
129 a set of behaviours involving resource sharing and penalizing a norm violator and a  
130 population mostly occupied by egalitarian ( $E_1C_1$ ) individuals, respectively.

## 131 Results

132 To investigate which factors can promote the evolution of egalitarian behaviour, we  
133 consider as the initial condition that the population is almost occupied by monopolisers  
134 and examine a few other strategies that can invade the population.



(payoff of owner, payoff of  $C_1$  peer, payoff of  $C_0$  peer)

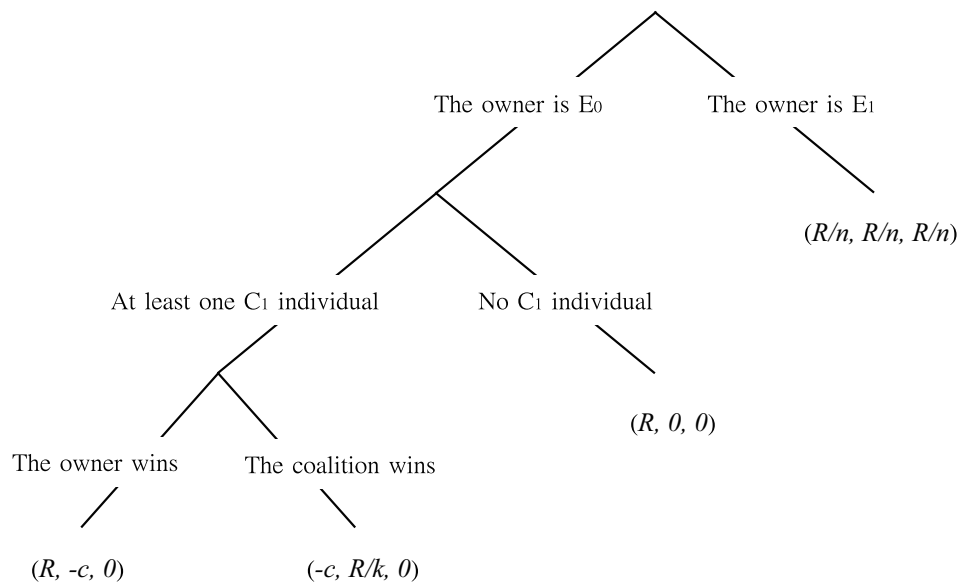

Figure 1: Payoffs of the owner and peers who join and do not join the coalition in different situations.

135 Figure 2(a) shows an example of the trajectory of the four strategies. First, the  
136 frequency of greedy individuals, who attempt to monopolise the resource when they are  
137 an owner and also form a coalition when they are a peer, increased. After the frequency  
138 of greedy individuals reached a certain level, the frequency of egalitarian individuals  
139 suddenly increased. The frequency of pacifist individuals remained low, although they  
140 did not become extinct. It should be noted that, once resource sharing behaviour was  
141 fixed in a population (i.e. the population was occupied by pacifist and/or egalitarian  
142 individuals), the frequencies did not change. This is because all individuals share their  
143 resources so that norm violators are not punished.

144 Figures 2(b) and (c) show an example of changes in the fitness of the four strategies.  
145 When the frequency of monopoliser individuals was large, the payoffs of monopoliser and  
146 greedy individuals were larger than those of other two strategies. For a strong individual,  
147 the payoff of a greedy individual was larger than that of a monopoliser individual (Fig-  
148 ure 2 (b)). On the other hand, for a weak individual, the opposite was true (Figure 2 (c)).  
149 As the frequency of greedy individuals increased, the payoffs of monopoliser and greedy  
150 individuals decreased. This could be because, as the frequency of individuals forming a  
151 coalition (i.e. greedy and egalitarian individuals) increases, monopoliser and greedy in-  
152 dividuals are more likely to be punished. The fitness of egalitarian individuals increased  
153 at first, associated with the decrease in the fitness values of monopoliser and greedy  
154 individuals, although the increase in fitness is larger for weak individuals than for strong  
155 individuals. This could be because weak individuals could win due to a larger number of  
156 group members joining a coalition. The fitness of egalitarian individuals also decreased  
157 when the fitness values of monopoliser and greedy individuals were below a certain level.  
158 The reason is as follows. First, when the frequency of monopoliser and greedy individ-  
159 uals is large, the coalition of egalitarian individuals can enjoy larger payoffs by taking  
160 resources from the owner rather than monopoliser and pacifist individuals. Second, after  
161 the frequency of monopoliser and greedy individuals decreases, punishment is hard to

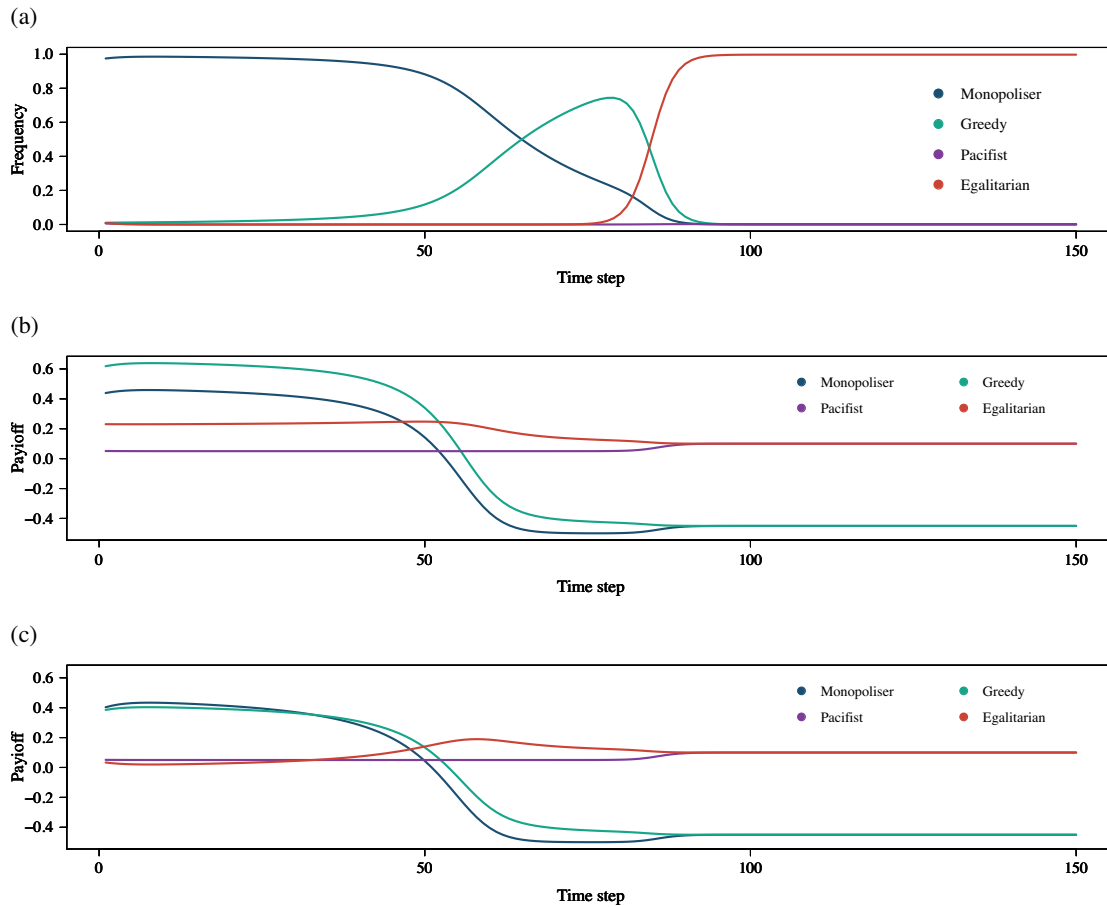

Figure 2: An example of changes in frequency and fitness of the four strategies. The initial frequencies of the four strategies are  $(x_{00}, x_{01}, x_{10}, x_{11}) = (0.97, 0.01, 0.01, 0.01)$ . We set  $\gamma = 1$ ,  $s_s = 2$ ,  $s_w = 1$ ,  $R = 1$ ,  $\alpha = 2$ ,  $\beta = 1$ ,  $\phi = 0.25$ ,  $c = 1$  and  $n = 10$ . (a) Frequency of the four strategies. (b) Fitness values of strong individuals. (c) Fitness values of weak individuals.

162 occur, indicating that egalitarian individuals can only receive equally distributed payoffs.  
163 The fitness values of strong and weak pacifist individuals were almost stable, although  
164 they became the same after the extinction of monopoliser and greedy individuals.

165 We also investigated which factors can affect the evolution of egalitarian behaviour.  
166 Figure 3 suggests that high values of  $\beta$ , small cost of competition,  $c$ , and a variation in  
167 the strength of individuals (i.e. an intermediate value of  $\phi$ ) can promote the evolution  
168 of egalitarian behaviour. Figure 4 also shows that large group size,  $n$ , can promote the  
169 evolution of egalitarian behaviour.

170 We further investigate the effects of group size,  $n$ , and  $\phi$  on the probability of winning  
171 of the coalition and fitness of greedy individuals at the initial condition. Figure 5 shows  
172 effects of  $n$  on the probability of winning the coalition and the fitness value of greedy  
173 individuals.

174 As  $n$  increases, the probability of winning the coalition and the fitness value of greedy  
175 individuals increases. This can be because larger groups can include a larger number of  
176  $C_1$  individuals, resulting in higher probability of winning the coalition.

177 Figure 6 shows the effects of  $\phi$  on the probability of winning the coalition and the  
178 fitness value of greedy individuals.

179 As  $\phi$  increases, the probability of winning the coalition decreases. The optimal value  
180 of  $\phi$  exists to maximise the fitness value of greedy individuals.

## 181 Discussion

182 In the present study, we investigated the evolution of egalitarian behaviour based on an  
183 n-player game extension of Gavrilets's [24] model. Our results suggest that the evolution  
184 of egalitarian behaviour can be promoted by (i) potentially despotic payoff structure  
185 ( $\beta$ ), (ii) large group size ( $n$ ), (iii) small cost of competition ( $c$ ) and (iv) variation in  
186 the strength of individuals ( $\phi$ ). In supplementary information, we also investigated ef-

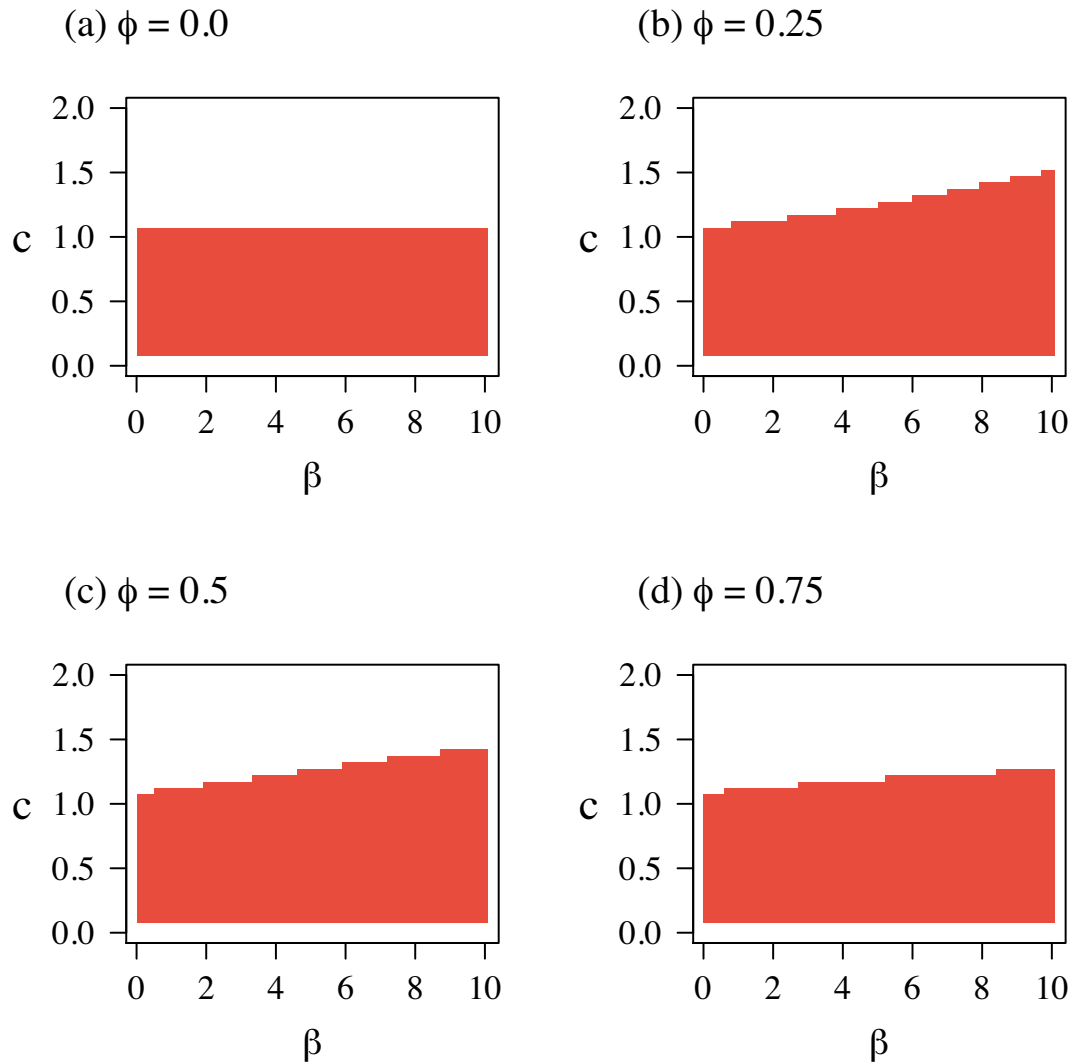

Figure 3: Evolution of egalitarian behaviour under various combinations of  $\beta$  and  $c$ . Red regions represent the fixation of  $E_1$  behaviour; that is, the equilibrium frequency of  $y$  is equal to unity. In addition, the frequencies of egalitarian individuals are close to unity in these regions. The initial frequencies of the four strategies are  $(x_{00}, x_{01}, x_{10}, x_{11}) = (0.97, 0.01, 0.01, 0.01)$ . We set  $\gamma = 1$ ,  $s_s = 2$ ,  $s_w = 1$ ,  $R = 1$ ,  $\alpha = 2$  and  $n = 10$ .

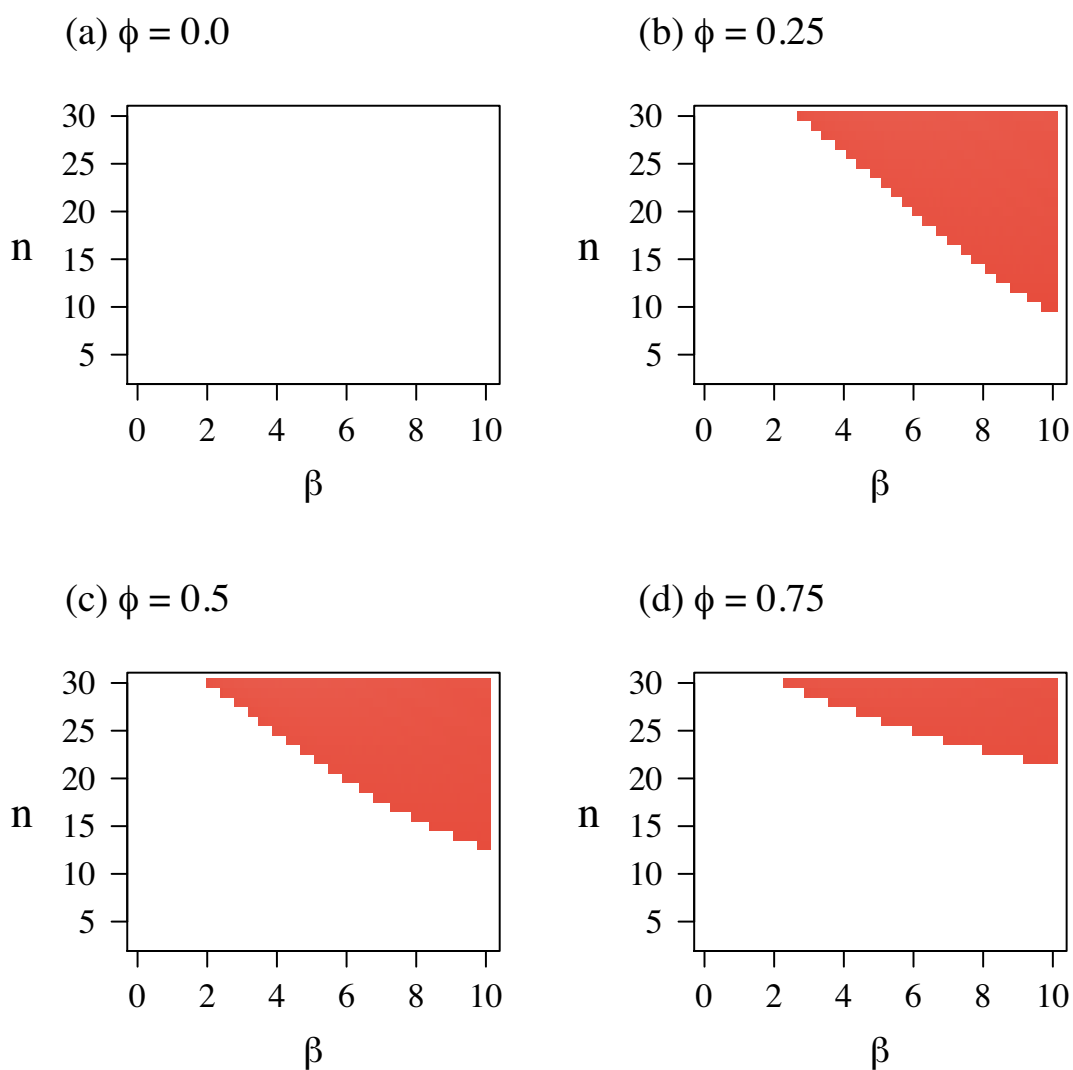

Figure 4: Evolution of egalitarian behaviour under various combinations of  $\beta$  and  $n$ . Red regions represent the fixation of  $E_1$  behaviour. The frequencies of egalitarian individuals are close to unity in these regions. The initial frequencies of the four strategies are  $(x_{00}, x_{01}, x_{10}, x_{11}) = (0.97, 0.01, 0.01, 0.01)$ . We set  $\gamma = 1$ ,  $s_s = 2$ ,  $s_w = 1$ ,  $R = 1$ ,  $\alpha = 2$  and  $c = 1.5$ .

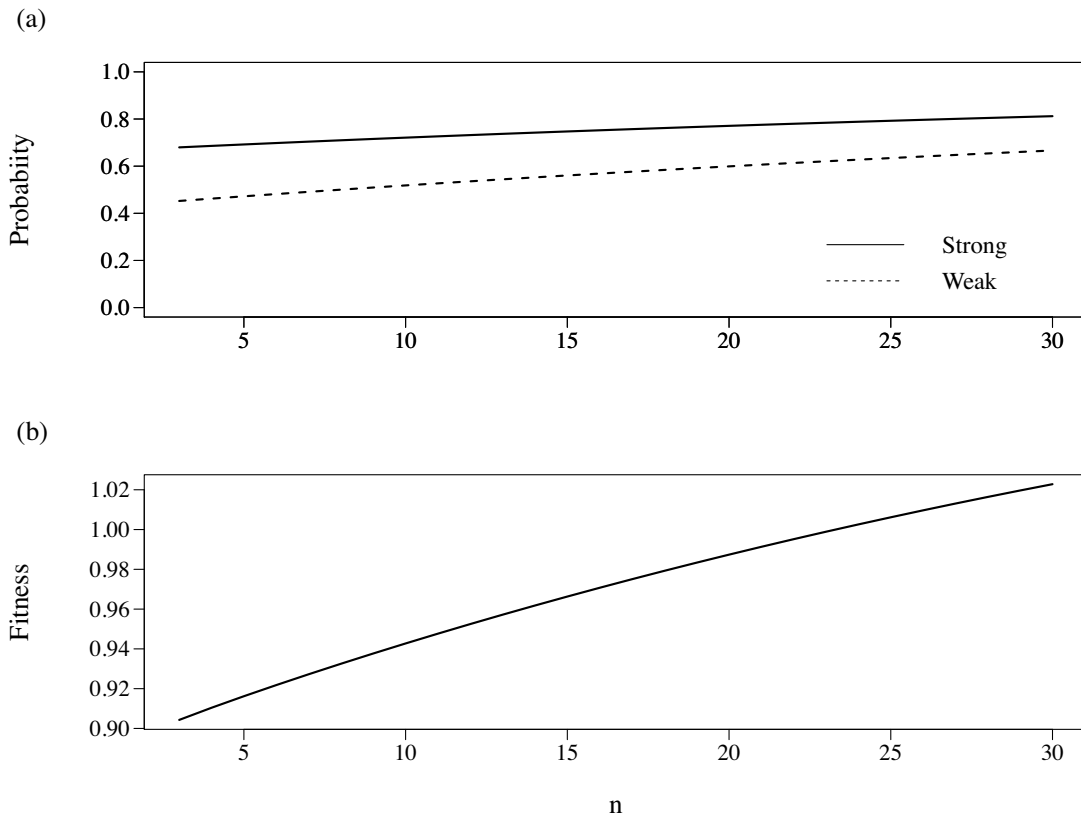

Figure 5: Probability of winning the coalition and fitness for various values of  $n$  at the initial condition. The initial frequencies of the four strategies are  $(x_{00}, x_{01}, x_{10}, x_{11}) = (0.97, 0.01, 0.01, 0.01)$ . We set  $\gamma = 1$ ,  $s_s = 2$ ,  $s_w = 1$ ,  $R = 1$ ,  $\alpha = 2$  and  $c = 1.5$ .

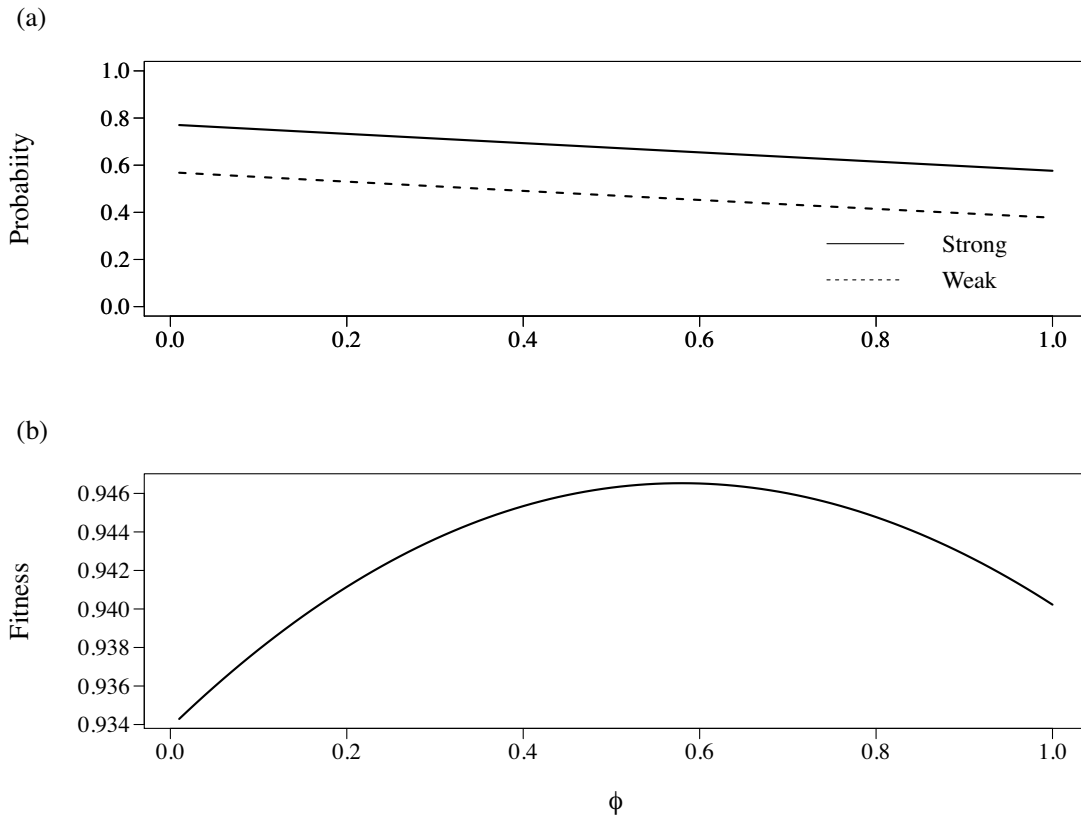

Figure 6: Probability of winning the coalition and fitness for various values of  $\phi$  at the initial condition. The initial frequencies of the four strategies are  $(x_{00}, x_{01}, x_{10}, x_{11}) = (0.97, 0.01, 0.01, 0.01)$ . We set  $\gamma = 1$ ,  $s_s = 2$ ,  $s_w = 1$ ,  $R = 1$ ,  $\alpha = 2$  and  $c = 1.5$ .



187 facts of the synergy of the coalition,  $\alpha$ , and the strength of a strong individual,  $s_s$ , on  
188 the evolution of egalitarian behaviour. Our results suggest that effects of  $\alpha$  is minor  
189 but large difference in fighting ability between strong and weak individuals can pro-  
190 mote the evolution of egalitarian behaviour (Figure S1–S4). Gavrilets [24] reported that  
191 a potentially despotic payoff can promote the evolution of egalitarianism. Consistent  
192 with Gavrilets’s [24] results, our result also confirmed that a potentially despotic payoff  
193 structure can significantly affect the evolution of an egalitarian society.

194 The evolutionary transition from a population of monopoliser individuals to that of  
195 egalitarian individuals can be divided into two stages as follows. First, the frequency of  
196 greedy individuals increases if the fitness value of strong greedy individuals outperforms  
197 that of strong monopoliser individuals. Second, after the frequency of greedy individuals  
198 exceeds a certain level, greedy individuals are punished by a coalition. The frequency  
199 of egalitarian individuals, who joined the coalition and are not punished, increases, and  
200 eventually egalitarian individuals dominate the population. The four factors we men-  
201 tioned above can contribute to the first stage. When the payoff structure is potentially  
202 despotic, that is,  $\beta$  is large, the fitness of the most successful type of individuals is  
203 representative. The fitness of each individual is composed of that of strong and weak  
204 individuals. As Figure 2 shows, the fitness values of strong greedy individuals are the  
205 largest but those of weak greedy individuals are less than those of monopoliser individ-  
206 uals. A large value of  $\beta$  emphasizes the fitness of strong greedy individuals and weakens  
207 the disadvantage of weak greedy individuals. As a result, a large value of  $\beta$  can be  
208 advantageous at the first stage.

209 When group size,  $n$ , is large, larger groups can include a larger number of  $C_1$  in-  
210 dividuals, resulting in higher probability of winning the coalition. This effect is more  
211 important at the first stage than at the second stage, because there are a lot of  $C_1$  in-  
212 dividuals at the second stage; that is, a group has a sufficient number of  $C_1$  individuals  
213 even if  $n$  is small.

214 Cost of competition,  $c$ , occurs only when  $C_1$  individuals exist. At the initial condi-  
215 tion, because the majority of the population comprises monopoliser individuals, many  
216 monopoliser individuals interact with other monopoliser individuals. In this case, there  
217 is no competition. Therefore, only a small proportion of monopoliser individuals suffer  
218 the cost of competition, and small  $c$  is beneficial for greedy individuals or the evolution  
219 of egalitarian behaviour.

220  $\phi$  also works at the first stage and has an advantage and disadvantage for the evolution  
221 of greedy individuals. An advantage is an increase in strong individuals. An adaptive  
222 advantage of greedy individuals is through strong individuals defeating the owner: as  
223 shown in Figure 2, the fitness value of strong greedy individuals is larger than that of  
224 strong monopoliser individuals, while that of weak greedy individuals is less than that of  
225 weak monopoliser individuals. Therefore, increase in  $\phi$  also increases strong individuals,  
226 which could provide an adaptive advantage to greedy individuals. A disadvantage is the  
227 decrease in the probability of winning the coalition. At the initial condition, since the  
228 frequency of  $C_1$  individuals is very low, the number of individuals joining the coalition is  
229 very small. As  $\phi$  increases, the owner is more likely to be strong and thus less likely to  
230 be defeated; that is, the probability that the coalition wins decreases (Figure 6(a)). As a  
231 result, the optimal value of  $\phi$  is determined based on the balance of the above-mentioned  
232 advantages and disadvantage.

233 In this study, we assumed the repeated interaction. In the supplementary information,  
234 we also examined the one-shot interaction. Egalitarian behaviour is more likely to evolve  
235 in the case of one-shot interaction than that of repeated interaction, while the qualitative  
236 tendencies are the same in both cases (Figures S5 and S6).

237 The results in the main text suggest that large group size can promote the evolution  
238 of egalitarian behaviour. In supplementary information, we investigated a model in  
239 which, when a coalition wins a competition over the resource, individuals who joined  
240 the coalition equally distribute the resource to all group members rather than share just

241 within the coalition. In this situation, the evolution of egalitarian behaviour is likely to  
242 occur in a small group (Figures S8), which is inconsistent with the results in the main  
243 text. These discrepancies suggest that the heavy dependence of the evolution of sharing  
244 behaviour on group size is strongly related to the range of sharing.

245 In our model, egalitarian ethos has two components, resource sharing and punishment  
246 of monopolisers. Although a monopoliser is rarely observed in ethnographic records and  
247 thus punishment of monopolisers is also not likely to be recorded, our model implies  
248 that the evolution of egalitarian ethos is difficult to achieve by only pacifist individuals.  
249 Further, our results show that the evolution of egalitarian individuals occurred after the  
250 evolution of greedy individuals, implying that the evolution of resource sharing could  
251 follow the evolution of coalition formation.

252 Our model is based on Gavrilets's [24] model. However, there are several differ-  
253 ences. First, Gavrilets's model is stochastic, while our model is deterministic. Second,  
254 Gavrilets's model assumes (potentially) triadic interaction, while our model considers  
255 n-player interaction. Third, in Gavrilets's model, the bully who attempts to take an  
256 amount of resource from the owner is a possible norm violator. On the other hand, in  
257 our model, the owner could be a monopoliser if he or she did not share the resource.  
258 Fourth, Gavrilets's model tracks the evolution of the escalation threshold of each in-  
259 dividual. If the difference in the strength of two individuals is smaller than the focal  
260 individual's escalation threshold, the individual behaves in an aggressive manner. In  
261 our model, however, each individual's decision making only depends on the owner's be-  
262 haviour.

263 Our model makes some unrealistic assumptions. First, we assume that individuals  
264 form a group in each generation. Second, we also assume that the strength of individuals  
265 is dichotomised into strong and weak. In reality, the strength of individuals should  
266 be distributed continuously. Third, actual individuals may consider the strength of  
267 opponents, although our model, as well as Gavrilets's [24] model, neglects this factor.

268 Incorporating such factors can warrant further investigation.

## References

- 269
- 270 [1] Maestriperi D. 2008 *Macchiavellian intelligence: how rhesus macaques and hu-*  
271 *mans have conquered the world*. Chicago, IL: University of Chicago Press.
- 272 [2] Wrangham RW, Peterson D. 1996 *Demonic males: apes and the origins of human*  
273 *violence*. Boston, MA: Houghton Mifflin Harcourt.
- 274 [3] Flannery K. 2012 *The creation of inequality: how our prehistoric ancestors set the*  
275 *stage for monarchy, slavery, and empire*. Boston, MA: Harvard University Press.
- 276 [4] Dawes CT, Fowler JH, Johnson T, McElreath R, Smirnov O. 2005 Egalitarian mo-  
277 tives in humans. *Nature* **446**, 794–796. (doi:10.1038/nature05651)
- 278 [5] Fehr E, Bernhard H, Rockenbach B. 2008 Egalitarianism in young children. *Nature*  
279 **454**, 1079–83. (doi:10.1038/nature07155)
- 280 [6] Johnson T, Dawes CT, Fowler JH, McElreath R, Smirnov O. 2009 The role  
281 of egalitarian motives in altruistic punishment. *Econ. Lett.* **102**, 192–194.  
282 (doi:10.2139/ssrn.1008038)
- 283 [7] Woodburn J. 1982 Egalitarian societies. *Man* **17**, 431–451. (doi: 10.2307/2801707)
- 284 [8] Fehr E, Schmidt KM. 1999 A theory of fairness, competition, and cooperation. *Q.*  
285 *J. Econ.* **114**, 817–868.
- 286 [9] Güth W, Schmittberger R, Schwarze, B. 1982 An experimental analysis of ul-  
287 timatum bargaining. *J. Econ. Behav. Organ.* **3**, 367–388. (doi:10.1016/0167-  
288 2681(82)90011-7)
- 289 [10] Roth AE, Prasnikar V, Okuno-Fujiwara M, Zamir S. 1991 Bargaining and market  
290 behavior in Jerusalem, Ljubljana, Pittsburgh, and Tokyo: an experimental study.  
291 *Am. Law. Econ. Rev.* **81**, 1068–1095.

- 292 [11] Camerer C, Thaler RH. 1995 Anomalies: ultimatums, dictators and manners. *J.*  
293 *Econ. Perspect.* **9**, 209–219.
- 294 [12] Oosterbeek H, Sloof R, Van De Kuilen G. 2004 Cultural differences in ultima-  
295 tum game experiments: evidence from a meta-analysis. *Exp. Econ.* **7**, 171–188.  
296 (doi:10.1023/B:EXEC.0000026978.14316.74)
- 297 [13] Boehm C, Barclay HB, Dentan RK, Dupre MC, Hill JD, Kent S, Knauft BM,  
298 Otterbein KF, Rayner S. 1993 Egalitarian behavior and reverse dominance hierarchy  
299 [and comments and reply]. *Curr. Anthropol.* **34**, 227–254.
- 300 [14] Boehm C. 1997 Impact of the human egalitarian syndrome on Darwinian selection  
301 mechanics. *Am. Nat.* **150**, S100–S121. (doi:10.1086/286052)
- 302 [15] Boehm C. 2009 *Hierarchy in the forest: the evolution of egalitarian behaviour.*  
303 Boston, MA: Harvard University Press.
- 304 [16] Boehm C. 2012 *Moral origins: the evolution of virtue, altruism, and shame.* New  
305 York, NY: Basic Books.
- 306 [17] Binmore K, Samuelson L. 1994 An economist’s perspective on the evolution of  
307 norms. *J. Inst. Theor. Econ.* **150**, 45–63.
- 308 [18] Nowak MA, Page KM, Sigmund K. 2000 Fairness versus reason in the ultimatum  
309 game. *Science* **289**, 1773–1775. (doi:10.1126/science.289.5485.1773)
- 310 [19] Rand DG, Tarnita CE, Ohtsuki H, Nowak MA. 2013 Evolution of fairness in the  
311 one-shot anonymous Ultimatum Game. *Proc. Natl. Acad. Sci. Unit. States Am.* **110**,  
312 2581–2586. (doi:10.1073/pnas.1214167110)
- 313 [20] Skyrms B. 2014 *Evolution of the social contract.* Cambridge, UK: Cambridge Uni-  
314 versity Press.

- 315 [21] Binmore K. 2005 *Natural justice*. New York, NY: Oxford University Press.
- 316 [22] Scheuring I. 2010 Egalitarian motive in punishing defectors. *J. Theor. Biol.* **264**,  
317 1293–1295. (doi:10.1016/j.jtbi.2010.02.047)
- 318 [23] Tamura K, Morita RC, Ihara Y. 2011 Evolution of egalitarian punishment. *Lett.*  
319 *Evol. Behav. Sci.* **2**, 20–23. (doi:10.5178/lebs.2011.14)
- 320 [24] Gavrillets S. 2012 On the evolutionary origins of the egalitarian syndrome. *Proc. Natl.*  
321 *Acad. Sci. Unit. States Am.* **109**, 14069–14074. (doi:10.1073/pnas.1201718109)
- 322 [25] Buchanan JM, Tollison RD, Tullock, G. 1980 *Toward a theory of the rent-seeking*  
323 *society*. College Station, TX: Texas A&M University.
